# Supplementary material for: Novel Role of miR-18a-5p and Galanin in Rat Lung Ischemia Reperfusion-Mediated Response
Source: Oxid Med Cell Longev. 2021 Aug 14;2021:6621921. doi: 10.1155/2021/6621921 (PMC8420977; doi:10.1155/2021/6621921)
Supplement: Supplementary 1 — Supplementary Table S1: list of differentially expressed miRNAs on IR lung injury from rat lungs. [file 6621921.f1.xls]

## Sheet: Supplementary Table S1
sRNA	IR_readcount	NC_readcount	log2FoldChange	pval	padj
rno-miR-434-5p	327.669	46.3014	2.839	2.1271e-18	1.0742e-15
rno-miR-370-3p	107.46	7.26395	3.8996	7.1509e-14	1.8056e-11
rno-miR-379-5p	354.686	103.842	1.7779	6.8581e-09	1.1544e-06
rno-miR-1-3p	241.765	98.4067	1.2928	1.0378e-07	1.1724e-05
rno-miR-3571	241.372	98.4067	1.2904	1.1608e-07	1.1724e-05
rno-miR-29c-5p	785.763	361.001	1.1168	1.4307e-07	1.2042e-05
rno-miR-127-5p	62.3382	11.8613	2.4299	2.2053e-07	1.591e-05
rno-miR-136-3p	169.496	44.6636	1.9399	3.0422e-07	1.9204e-05
rno-miR-134-5p	106.1	19.0554	2.4878	1.6464e-06	9.238e-05
rno-miR-127-3p	995.082	299.161	1.7347	3.4482e-06	0.00014511
rno-miR-128-3p	3465.13	7833.89	-1.1774	3.2938e-06	0.00014511
rno-miR-15b-5p	847.217	1574.36	-0.89736	3.3996e-06	0.00014511
rno-miR-18a-5p	86.6254	253.543	-1.5594	6.7272e-06	0.00023362
rno-miR-300-3p	92.803	22.8337	2.0256	6.7793e-06	0.00023362
rno-miR-411-5p	912.465	288.248	1.6637	6.9393e-06	0.00023362
rno-miR-667-5p	21.5665	0	7.0694	7.5166e-06	0.00023724
rno-miR-92a-3p	5500.8	9215.25	-0.74456	8.1937e-06	0.0002434
rno-miR-150-5p	6624.55	11410.3	-0.78374	1.185e-05	0.00033247
rno-miR-29b-5p	215.189	94.1263	1.1781	1.4668e-05	0.00038011
rno-miR-411-3p	66.8504	13.3251	2.3017	1.5054e-05	0.00038011
rno-miR-337-5p	44.0406	10.2263	2.1439	1.9742e-05	0.00047474
rno-miR-299b-5p	46.8359	8.55914	2.4661	4.646e-05	0.0010665
rno-miR-382-5p	54.1682	11.5537	2.2206	5.395e-05	0.0011845
rno-miR-409a-3p	83.8639	13.578	2.631	7.2783e-05	0.0015315
rno-miR-409b	82.691	13.578	2.6105	8.016e-05	0.0016192
rno-miR-199a-3p	8485.82	13538.6	-0.67353	8.7126e-05	0.0016923
rno-miR-299a-3p	55.3704	11.0686	2.3339	0.00014347	0.0025876
rno-miR-382-3p	36.4432	8.23112	2.1712	0.00014281	0.0025876
rno-miR-194-5p	2064.57	1042.21	0.98367	0.0001684	0.0029325
rno-miR-3592	35.6982	8.23112	2.1446	0.00018288	0.0030785
rno-miR-192-5p	7699.53	3813.9	1.013	0.00019125	0.0031156
rno-miR-139-5p	6281.05	4192.47	0.58251	0.00020817	0.0032502
rno-miR-146a-5p	6440.83	11753.1	-0.86781	0.00021239	0.0032502
rno-miR-330-3p	433.227	248.543	0.79501	0.00027108	0.0040263
rno-miR-335	7.80369	42.5988	-2.3996	0.00028724	0.0041444
rno-miR-493-3p	14.5234	1.14434	3.6564	0.00034395	0.0048249
rno-miR-15b-3p	76.0341	154.195	-1.0094	0.00051386	0.0070134
rno-miR-541-5p	846.979	84.7412	3.3216	0.00063569	0.008448
rno-miR-495	38.2924	5.93655	2.6832	0.00065945	0.008539
rno-miR-363-3p	264.362	528.028	-1.0047	0.0008878	0.011209
rno-miR-214-3p	602.748	1013.46	-0.74793	0.00092573	0.011402
rno-miR-147	195.84	448.565	-1.1977	0.00097119	0.011677
rno-miR-329-5p	12.6117	0.287557	5.3172	0.0013487	0.01584
rno-miR-27a-5p	1769.29	711.107	1.3159	0.0014693	0.016864
rno-miR-20b-5p	40.2498	107.387	-1.4678	0.0018187	0.020409
rno-miR-324-5p	123.064	302.736	-1.2991	0.0019213	0.021092
rno-miR-17-1-3p	33.8855	75.3522	-1.11	0.0020165	0.021215
rno-miR-23a-3p	27795	42539.3	-0.61403	0.0019821	0.021215
rno-miR-200a-5p	2615.85	1925.09	0.44255	0.0021195	0.021237
rno-miR-23b-3p	11212.2	18569.2	-0.72786	0.0021402	0.021237
rno-miR-3543	98.1915	36.121	1.4585	0.0023129	0.021237
rno-miR-3578	17.9533	3.72056	2.2977	0.0021899	0.021237
rno-miR-369-5p	17.9533	3.72056	2.2977	0.0021899	0.021237
rno-miR-434-3p	98.1915	36.121	1.4585	0.0023129	0.021237
rno-miR-652-3p	1616.9	3159.97	-0.96543	0.0022346	0.021237
rno-miR-3559-5p	1661.54	2418.23	-0.54066	0.0023892	0.021545
rno-miR-3120	179.334	271.208	-0.58838	0.0024382	0.021602
rno-miR-142-3p	1545.59	2481.23	-0.68516	0.0025106	0.02186
rno-miR-341	53.9848	17.3508	1.6591	0.0029624	0.025356
rno-miR-410-3p	18.6081	2.84335	2.7547	0.0030441	0.025621
rno-miR-339-5p	1993.4	2913.97	-0.54936	0.0031602	0.026162
rno-miR-540-3p	9.04508	0.627359	3.9479	0.0035558	0.028963
rno-miR-200b-3p	45290.4	31247.5	0.53541	0.0036423	0.029196
rno-miR-379-3p	12.9225	2.05925	2.6489	0.0046382	0.036598
rno-miR-3548	2440.61	1828.93	0.4166	0.0047508	0.03691
rno-miR-181c-3p	183.865	317.118	-0.76718	0.0048312	0.036966
rno-miR-181a-1-3p	1372.78	1916.09	-0.47836	0.0063714	0.046981
rno-miR-3570	1374.17	1916.66	-0.47734	0.0064192	0.046981
rno-miR-466b-2-3p	18.946	49.8251	-1.4134	0.0062398	0.046981
