# Supplementary material for: Novel Role of miR-18a-5p and Galanin in Rat Lung Ischemia Reperfusion-Mediated Response
Source: Oxid Med Cell Longev. 2021 Aug 14;2021:6621921. doi: 10.1155/2021/6621921 (PMC8420977; doi:10.1155/2021/6621921)
Supplement: Supplementary 2 — Supplementary Table S2: list of genes targeted by miR-18a-5p. [file 6621921.f2.xls]

## Sheet: Supplementary Table S2
miRNA	target_mRNA	target_gene	Gene Name	IR_FPKM	NC_FPKM	log2FoldChange
rno-miR-18a-5p	ENSRNOT00000001912	ENSRNOG00000001410	Gigyf1	8.04178	10.5094	-0.341115
rno-miR-18a-5p	ENSRNOT00000010619	ENSRNOG00000007883	Timm10	6.25956	4.17624	0.601708
rno-miR-18a-5p	ENSRNOT00000012879	ENSRNOG00000009513	Akr1b1	20.314	25.9909	-0.301313
rno-miR-18a-5p	ENSRNOT00000020425	ENSRNOG00000015156	Gal	3.33079	0.099244	5.10721
rno-miR-18a-5p	ENSRNOT00000021783	ENSRNOG00000016172	Ric1	5.18357	5.61818	0.0667111
rno-miR-18a-5p	ENSRNOT00000022658	ENSRNOG00000016706	Fanca	0.225178	0.318502	-0.449322
rno-miR-18a-5p	ENSRNOT00000024310	ENSRNOG00000017777	Ahcy	13.7499	10.7197	0.406917
rno-miR-18a-5p	ENSRNOT00000028431	ENSRNOG00000020935	Capn1	14.533	13.6701	0.110541
rno-miR-18a-5p	ENSRNOT00000035346	ENSRNOG00000005406	Clint1	19.8992	17.7849	0.290797
rno-miR-18a-5p	ENSRNOT00000047633	ENSRNOG00000018939	Rexo2	17.4912	17.5776	0.038545
rno-miR-18a-5p	ENSRNOT00000052098	ENSRNOG00000031789	Rangap1	11.866	8.3437	0.564799
rno-miR-18a-5p	ENSRNOT00000066715	ENSRNOG00000043137	Lbhd2	0.0832143	0.605858	-2.79541
rno-miR-18a-5p	ENSRNOT00000085865	ENSRNOG00000053025	AC130391.3	2.59083	3.34583	-0.283539
